# Supplementary figures and images for: Electrodeposition of catalytic and magnetic gold nanoparticles on dendrimer–carbon nanotube layer-by-layer films
Source: Royal Society of Chemistry journal article supplement (doi:10.1039/c2cp42813j), 2012-01-01

Supporting information

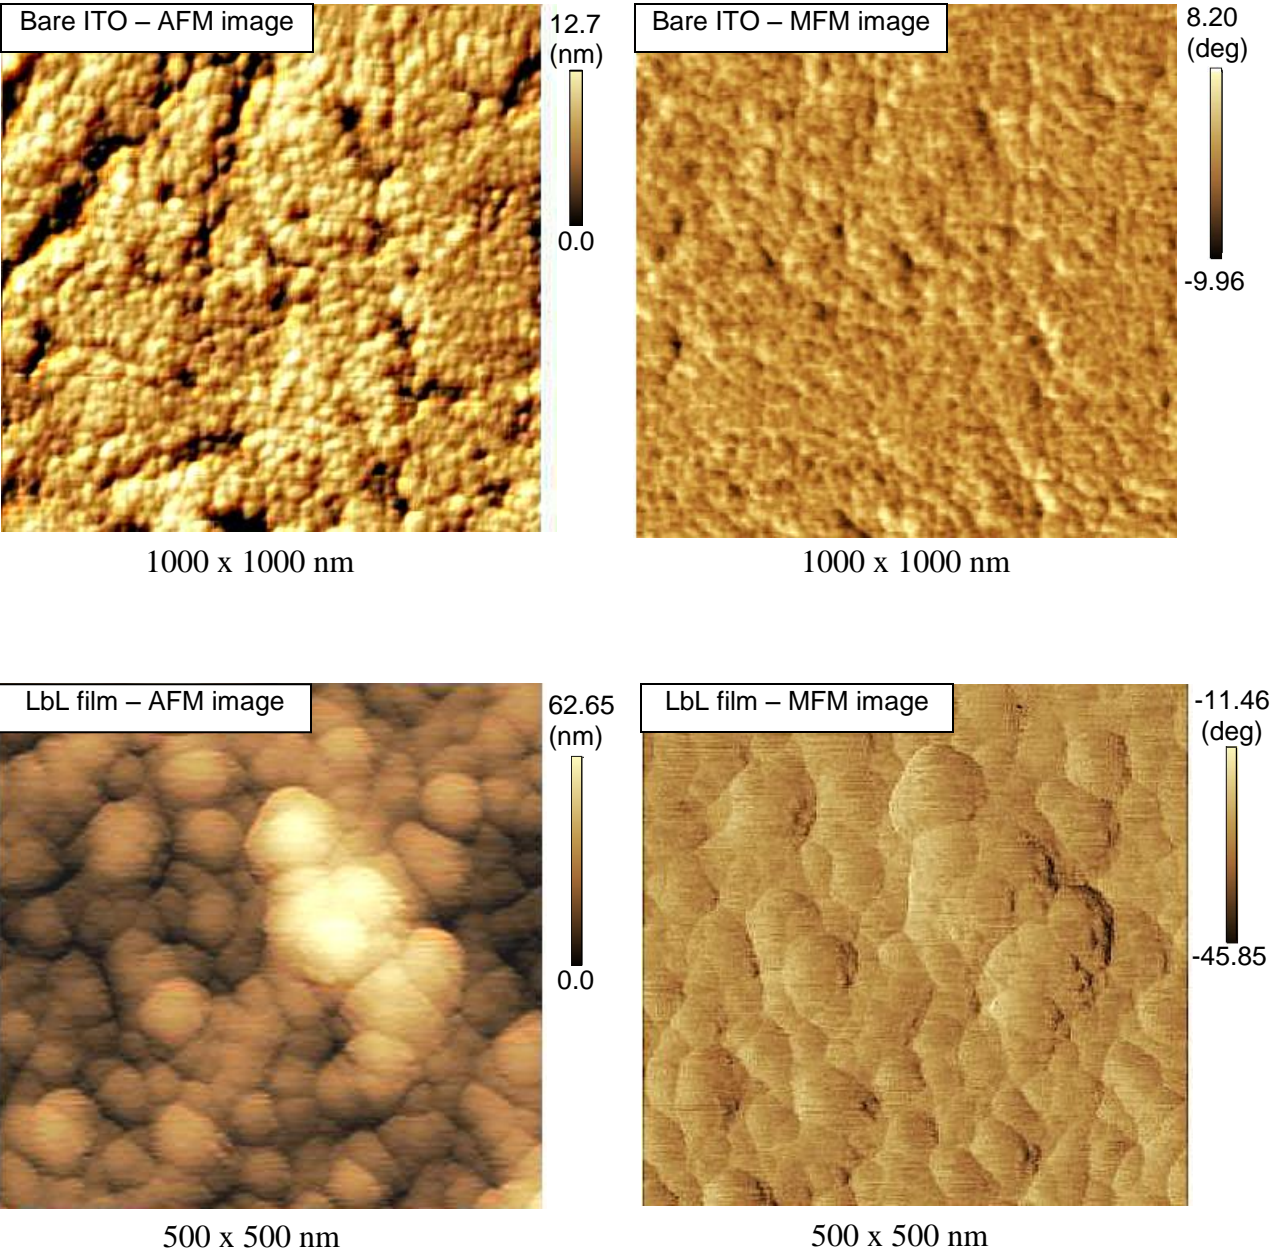

Supplement: c2cp42813j.pdf [file c2cp42813j.pdf]
